# Supplementary material for: Understanding ring-closing and racemization to prepare α-amino acid NCA and NTA monomers: a DFT study
Source: Royal Society of Chemistry journal article supplement (doi:10.1039/d0cp01174f), 2020-01-01
Supplement: d0cp01174f1.pdf [file d0cp01174f1.pdf]

## Supporting Information

# Understanding ring-closing and racemization to prepare $\alpha$ -amino acid NCA and NTA monomers: A DFT study

Tianwen Bai,<sup>b</sup> Bo Shen,<sup>a</sup> Da Cai,<sup>a</sup> Yifan Luo,<sup>c</sup> Peng Zhou,<sup>b</sup> Jingya Xia,<sup>a</sup> Botuo

Zheng,<sup>b</sup> Ke Zhang,<sup>a</sup> Rongze Xie,<sup>d</sup> Xufeng Ni,<sup>b</sup> Maosheng Xu,<sup>c</sup> Jun Ling<sup>\*b</sup> and

Jihong Sun<sup>\*a,d,e</sup>

<sup>a</sup> Department of Radiology, Sir Run Run Shaw Hospital, Zhejiang University, Hangzhou 310016, China.

<sup>b</sup> MOE Key Laboratory of Macromolecular Synthesis and Functionalization, Department of Polymer Science and Engineering, Zhejiang University, Hangzhou 310027, China.

<sup>c</sup> Department of Radiology, The First Affiliated Hospital of Zhejiang Chinese Medical University, Hangzhou, 310006, China.

<sup>d</sup> Department of Radiology, Jiulongpo People's Hospital, Chongqing 400050, China.

<sup>e</sup> Innovation Center for Minimally Invasive Techniques and Devices, Zhejiang University, Hangzhou 310016, China.

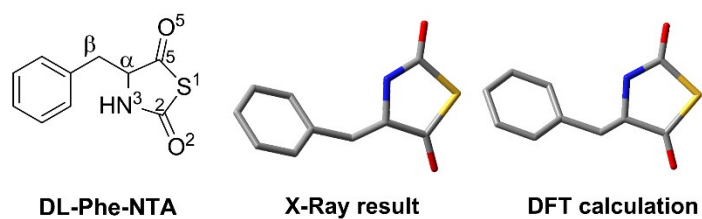

|                                                          | DFT calculation | X-Ray result |
|----------------------------------------------------------|-----------------|--------------|
| S <sup>1</sup> -C <sup>5</sup> (Å)                       | 1.78            | 1.77         |
| S <sup>1</sup> -C <sup>2</sup> (Å)                       | 1.82            | 1.80         |
| C <sup>2</sup> -N <sup>3</sup> (Å)                       | 1.36            | 1.33         |
| N <sup>3</sup> -C <sup>α</sup> (Å)                       | 1.44            | 1.45         |
| C <sup>α</sup> -C <sup>β</sup> (Å)                       | 1.54            | 1.53         |
| Angle C <sup>2</sup> -S <sup>1</sup> -C <sup>5</sup> (°) | 91.9            | 91.7         |

**Figure S1.** Comparison of DFT calculated geometry and single crystal structure of DL-phenylalanine-NTA with 3-D tube structure (hydrogen atoms are omitted for clarity), selected bond lengths and angles. The X-Ray result shows that DL-phenylalanine-NTA is cocrystal, and here only L-isomer is demonstrated to estimate reliability of DFT calculations.

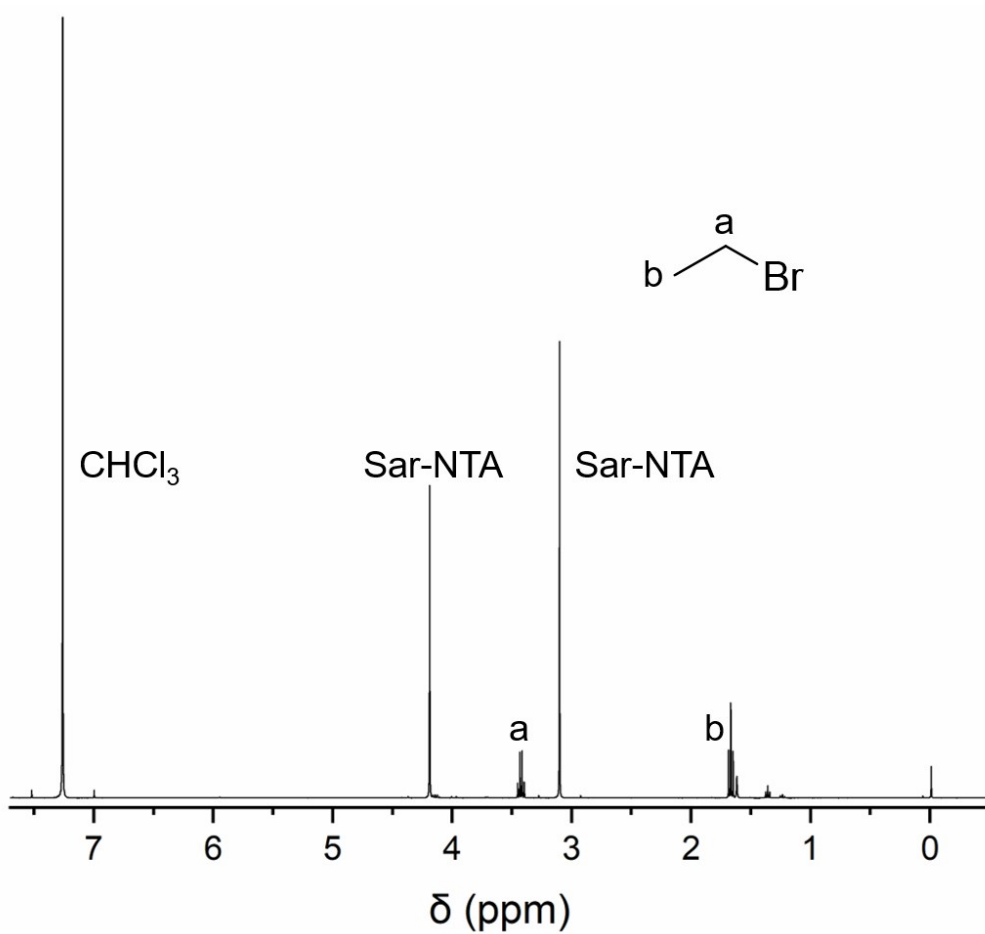

**Figure S2.**  $^1\text{H}$  NMR spectrum of EtBr produced in preparation of sarcosine-NTA (Sar-NTA) mediated by  $\text{PBr}_3$ . The Sar-NTA was prepared according to the report with the assignment of protons.<sup>1</sup>

**Table S1.** DFT calculated  $\Delta G$ s on ring-closing pathway of Ala-NTA with  $\text{PBr}_3$  and  $\text{PCl}_3$  using M06-2X/6-311++G(d,p), B3PW91/6-311++G(d,p) and BHandH/6-311++G(d,p)

|                      | $\Delta G_{\text{TS1\_Cl}} - \Delta G_{\text{TS1}}$ | $\Delta G_{2\_Cl} - \Delta G_2$ |
|----------------------|-----------------------------------------------------|---------------------------------|
| M06-2X/6-311++G(d,p) | +1.5                                                | +0.5                            |
| B3PW91/6-311++G(d,p) | +0.6                                                | +0.6                            |
| BHandH/6-311++G(d,p) | +1.7                                                | +1.6                            |

According to RRKM theory,<sup>2</sup> a  $\Delta G$  difference of 1.5 kcal/mol means a reactivity difference  $k_{\text{fast}}/k_{\text{slow}} = \exp(\Delta\Delta G/RT) = 13$  at room temperature which is not negligible in experiments.

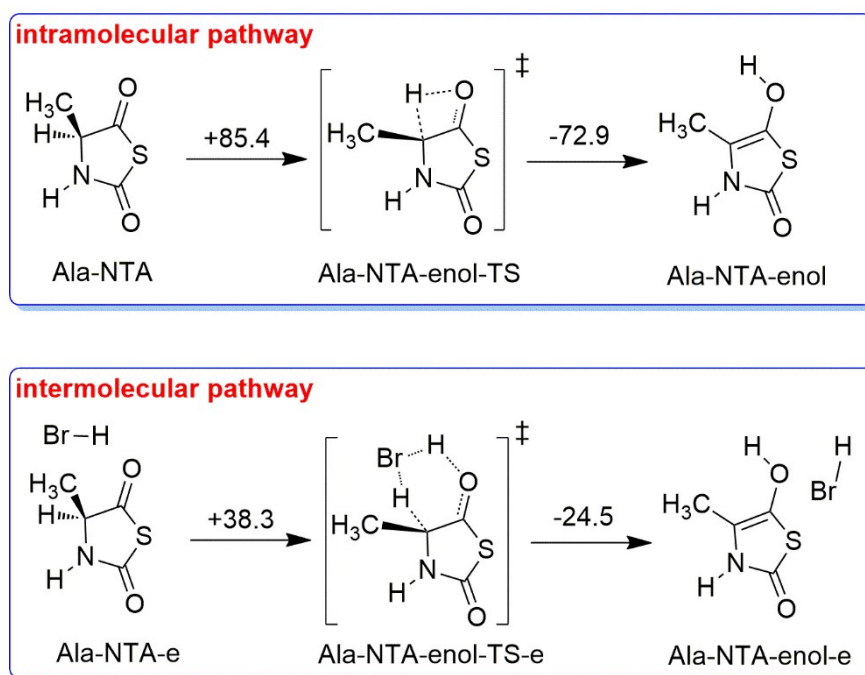

**Figure S3.** DFT calculated enol transformation of Ala-NTA with  $\Delta G$  (kcal/mol) under M06-2X/6-311++G(d,p) in DCM via intra- and intermolecular pathways.

### Optimized geometries by M06-2X/6-311++G(d,p) in DCM

**1**

|    |           |           |           |
|----|-----------|-----------|-----------|
| N  | -0.566511 | 0.536035  | -0.843670 |
| C  | 0.767498  | 1.032351  | -1.110016 |
| H  | 1.036278  | 0.638842  | -2.096718 |
| C  | 0.883600  | 2.551564  | -1.134930 |
| C  | 1.823069  | 0.417075  | -0.187918 |
| H  | 0.162516  | 2.943399  | -1.853760 |
| H  | 0.685707  | 2.978365  | -0.153094 |
| O  | 2.781154  | 0.941513  | 0.238883  |
| C  | -1.171844 | 0.572376  | 0.353984  |
| S  | -0.461883 | 1.172874  | 1.743233  |
| O  | -2.399366 | 0.079310  | 0.429671  |
| H  | 1.886453  | 2.838177  | -1.452807 |
| Br | 1.614352  | -1.558221 | 0.034018  |
| C  | -3.059746 | -0.498652 | -0.719271 |
| H  | -3.147350 | 0.263830  | -1.498704 |
| H  | -2.461298 | -1.338254 | -1.085357 |
| C  | -4.417754 | -0.963885 | -0.254515 |
| H  | -5.004786 | -0.123726 | 0.119614  |
| H  | -4.949215 | -1.415906 | -1.094070 |
| H  | -4.316539 | -1.709302 | 0.535920  |
| H  | -1.041640 | 0.112528  | -1.630122 |

**2**

|    |           |           |           |
|----|-----------|-----------|-----------|
| N  | -0.580368 | 0.517029  | -0.941195 |
| C  | 0.769550  | 0.974633  | -1.172427 |
| H  | 1.084742  | 0.535872  | -2.127050 |
| C  | 0.894493  | 2.491608  | -1.294879 |
| C  | 1.812551  | 0.408645  | -0.201954 |
| H  | 0.224709  | 2.823123  | -2.089416 |
| H  | 0.618077  | 3.012939  | -0.377084 |
| O  | 2.706641  | 0.978244  | 0.306262  |
| C  | -1.168394 | 0.578347  | 0.174156  |
| S  | -0.641190 | 1.190510  | 1.774329  |
| O  | -2.402826 | 0.108299  | 0.351640  |
| H  | 1.916239  | 2.766564  | -1.558647 |
| Br | 1.647039  | -1.555549 | 0.064355  |
| H  | 0.454280  | 1.841260  | 1.356533  |
| C  | -3.023277 | -0.563065 | -0.766907 |
| H  | -3.122253 | 0.150976  | -1.586805 |

|   |           |           |           |
|---|-----------|-----------|-----------|
| H | -2.366679 | -1.373966 | -1.089095 |
| C | -4.362339 | -1.068992 | -0.289552 |
| H | -4.994914 | -0.242974 | 0.040880  |
| H | -4.865653 | -1.582527 | -1.111351 |
| H | -4.239348 | -1.773811 | 0.534872  |

### 3

|    |           |           |           |
|----|-----------|-----------|-----------|
| N  | 0.502278  | -0.978307 | -0.946717 |
| C  | -0.847821 | -1.494167 | -0.971794 |
| H  | -1.475785 | -0.844146 | -1.590363 |
| C  | -0.896295 | -2.924195 | -1.509667 |
| C  | -1.448859 | -1.471748 | 0.437661  |
| H  | -0.498741 | -2.940088 | -2.524850 |
| H  | -0.290620 | -3.582096 | -0.881661 |
| O  | -2.563524 | -1.761040 | 0.743075  |
| C  | 0.912682  | -0.706726 | 0.215744  |
| S  | -0.170706 | -0.962402 | 1.618575  |
| O  | 2.093078  | -0.218753 | 0.546995  |
| H  | -1.925261 | -3.285880 | -1.523436 |
| Br | -1.189386 | 2.314133  | -0.241690 |
| H  | -0.798307 | 1.713024  | 0.991733  |
| C  | 3.012523  | 0.028152  | -0.546404 |
| H  | 3.180978  | -0.915389 | -1.069392 |
| H  | 2.541345  | 0.732749  | -1.234967 |
| C  | 4.279481  | 0.578864  | 0.057729  |
| H  | 4.715440  | -0.134807 | 0.759315  |
| H  | 5.003051  | 0.768390  | -0.737628 |
| H  | 4.085084  | 1.517421  | 0.580050  |

### 4

|    |           |           |           |
|----|-----------|-----------|-----------|
| N  | -0.348370 | -0.154943 | -0.102881 |
| C  | -1.210474 | -1.326101 | -0.185368 |
| H  | -1.020048 | -1.841215 | -1.132139 |
| C  | -1.007157 | -2.264129 | 1.000361  |
| C  | -2.643613 | -0.818955 | -0.223299 |
| H  | 0.026022  | -2.613511 | 1.003908  |
| H  | -1.216765 | -1.743403 | 1.936826  |
| O  | -3.625992 | -1.475986 | -0.310419 |
| C  | -0.925159 | 1.002542  | -0.033731 |
| S  | -2.675814 | 1.000703  | -0.073241 |
| O  | -0.347994 | 2.148582  | 0.056313  |
| H  | -1.677414 | -3.118300 | 0.900786  |
| Br | 2.609576  | -1.157474 | -0.135736 |
| C  | 1.121925  | 2.191871  | 0.095251  |

|   |          |           |           |
|---|----------|-----------|-----------|
| H | 1.441389 | 1.597025  | 0.952854  |
| H | 1.484607 | 1.730556  | -0.825161 |
| C | 1.512562 | 3.638968  | 0.214575  |
| H | 2.602012 | 3.700341  | 0.245708  |
| H | 1.157057 | 4.210056  | -0.644292 |
| H | 1.113749 | 4.074400  | 1.131907  |
| H | 0.709205 | -0.336946 | -0.101497 |

**5**

|    |           |           |           |
|----|-----------|-----------|-----------|
| N  | 0.755824  | -0.318695 | -0.144107 |
| C  | 1.827352  | -1.104527 | 0.430147  |
| H  | 1.609871  | -1.332791 | 1.478548  |
| C  | 2.101670  | -2.385861 | -0.351181 |
| C  | 3.065476  | -0.216277 | 0.427787  |
| H  | 1.210181  | -3.015320 | -0.345873 |
| H  | 2.365379  | -2.149809 | -1.384521 |
| O  | 4.133932  | -0.539558 | 0.852889  |
| C  | 0.982869  | 0.926542  | -0.595596 |
| S  | 2.723536  | 1.372026  | -0.324289 |
| O  | 0.191164  | 1.682568  | -1.101347 |
| H  | 2.921047  | -2.933190 | 0.116272  |
| Br | -2.818296 | -0.761434 | -0.137234 |
| C  | -2.765957 | 1.200383  | 0.133053  |
| H  | -3.810068 | 1.503592  | 0.132028  |
| H  | -2.254812 | 1.584056  | -0.745187 |
| C  | -2.054334 | 1.553301  | 1.416178  |
| H  | -1.019984 | 1.205279  | 1.409102  |
| H  | -2.045225 | 2.643204  | 1.513749  |
| H  | -2.563191 | 1.133856  | 2.285402  |
| H  | -0.183409 | -0.695665 | -0.233636 |

**d\_TS1**

|    |           |           |           |
|----|-----------|-----------|-----------|
| N  | 0.312465  | -0.865925 | -1.158202 |
| C  | -1.013581 | -1.345479 | -0.830329 |
| H  | -1.706575 | -1.029909 | -1.609793 |
| C  | -1.447103 | -0.660900 | 0.474511  |
| O  | -2.330622 | -0.966620 | 1.192309  |
| C  | 1.114154  | -0.472803 | -0.187957 |
| S  | 0.483762  | -0.445641 | 1.390955  |
| O  | 2.311903  | -0.107702 | -0.546521 |
| Br | -1.670283 | 1.575982  | -0.248342 |
| C  | 3.235758  | 0.411616  | 0.453448  |
| H  | 2.785429  | 1.302049  | 0.894711  |
| H  | 3.367659  | -0.354590 | 1.219691  |

|   |           |           |           |
|---|-----------|-----------|-----------|
| C | 4.524350  | 0.721236  | -0.262731 |
| H | 4.365947  | 1.470647  | -1.039929 |
| H | 5.240537  | 1.117371  | 0.459635  |
| H | 4.945979  | -0.179736 | -0.711172 |
| H | 0.617405  | -0.796329 | -2.124076 |
| C | -1.043012 | -2.857629 | -0.635193 |
| H | -2.056773 | -3.176263 | -0.390378 |
| H | -0.731084 | -3.343055 | -1.561126 |
| H | -0.369698 | -3.159492 | 0.169732  |

**r\_TS1**

|    |           |           |           |
|----|-----------|-----------|-----------|
| N  | 0.313463  | 1.252907  | 0.179089  |
| C  | -0.609430 | 0.785836  | 1.192550  |
| H  | -0.239108 | -0.077419 | 1.747593  |
| C  | -0.968806 | 1.913334  | 2.147714  |
| C  | -1.870963 | 0.285684  | 0.479374  |
| H  | -0.068462 | 2.218599  | 2.682486  |
| H  | -1.360381 | 2.769070  | 1.595415  |
| O  | -2.976325 | 0.654365  | 0.605746  |
| C  | 1.346185  | 0.684322  | -0.384819 |
| S  | 1.772785  | 1.652625  | -1.774040 |
| O  | 2.039380  | -0.383072 | -0.093526 |
| H  | -1.715261 | 1.580228  | 2.869547  |
| Br | -1.472351 | -1.197344 | -0.799126 |
| H  | 0.504729  | 2.123990  | -0.916331 |
| C  | 1.943212  | -1.042000 | 1.196433  |
| H  | 1.915119  | -0.275214 | 1.973696  |
| H  | 1.027233  | -1.635826 | 1.214217  |
| C  | 3.162745  | -1.919523 | 1.325551  |
| H  | 4.073881  | -1.319686 | 1.302801  |
| H  | 3.118433  | -2.454426 | 2.276196  |
| H  | 3.195204  | -2.650891 | 0.516239  |

**r\_TS2**

|   |           |          |           |
|---|-----------|----------|-----------|
| N | -0.727552 | 0.910101 | -0.810777 |
| C | 0.588840  | 1.442441 | -0.915902 |
| H | 1.085246  | 1.031242 | -1.799381 |
| C | 0.584277  | 2.972886 | -0.940306 |
| C | 1.513192  | 1.030761 | 0.240929  |
| H | -0.052912 | 3.289495 | -1.766808 |
| H | 0.177658  | 3.371122 | -0.007671 |
| O | 2.552323  | 1.306782 | 0.640179  |
| C | -1.116932 | 0.416728 | 0.277530  |
| S | -0.040390 | 0.383389 | 1.735659  |



|    |           |           |           |
|----|-----------|-----------|-----------|
| O  | -2.292454 | -0.122291 | 0.510725  |
| H  | 1.592590  | 3.356851  | -1.095682 |
| Br | 1.636013  | -1.647117 | -0.370146 |
| H  | 0.471345  | -0.853711 | 1.389467  |
| C  | -3.205305 | -0.190954 | -0.619220 |
| H  | -3.410553 | 0.829641  | -0.948318 |
| H  | -2.701088 | -0.727913 | -1.424780 |
| C  | -4.444774 | -0.902779 | -0.142167 |
| H  | -4.920673 | -0.355440 | 0.673401  |
| H  | -5.153034 | -0.975688 | -0.969819 |
| H  | -4.204680 | -1.911874 | 0.197198  |

### TS3

|    |           |           |           |
|----|-----------|-----------|-----------|
| N  | -1.193637 | -0.525817 | -0.345919 |
| C  | -2.441095 | -1.270120 | -0.394387 |
| H  | -2.583485 | -1.683892 | -1.396908 |
| C  | -2.507963 | -2.364291 | 0.665223  |
| C  | -3.553075 | -0.255864 | -0.169101 |
| H  | -1.708856 | -3.087403 | 0.496725  |
| H  | -2.399028 | -1.932909 | 1.662442  |
| O  | -4.718005 | -0.497551 | -0.160739 |
| C  | -1.216824 | 0.775321  | -0.089144 |
| S  | -2.874817 | 1.390310  | 0.127472  |
| O  | -0.255014 | 1.544534  | 0.003646  |
| H  | -3.467275 | -2.877753 | 0.594573  |
| Br | 3.724765  | -0.689372 | -0.033743 |
| C  | 1.556098  | 0.864508  | -0.023241 |
| H  | 1.333582  | 0.180274  | 0.779755  |
| H  | 1.471623  | 0.504723  | -1.038345 |
| C  | 2.212974  | 2.178260  | 0.238283  |
| H  | 2.243107  | 2.399084  | 1.304374  |
| H  | 3.228338  | 2.159146  | -0.152797 |
| H  | 1.665555  | 2.965150  | -0.283523 |
| H  | -0.314335 | -1.005397 | -0.512476 |

### Optimized geometries by M06-2X/6-311++G(d,p) for Phe-NTA

|   |           |           |           |
|---|-----------|-----------|-----------|
| S | -3.272361 | 0.122163  | 0.140506  |
| O | -2.308757 | -2.352762 | 0.144535  |
| O | -2.280226 | 2.550145  | -0.357279 |
| N | -0.847005 | 0.775481  | -0.567986 |
| H | -0.048169 | 1.365195  | -0.763459 |
| C | 2.498312  | -1.175430 | -0.448028 |
| H | 2.164094  | -2.124966 | -0.855398 |

|   |           |           |           |
|---|-----------|-----------|-----------|
| C | 3.746163  | -0.673496 | -0.796086 |
| H | 4.381411  | -1.230552 | -1.474508 |
| C | 4.181605  | 0.539687  | -0.269599 |
| C | 3.365019  | 1.242860  | 0.608485  |
| H | 3.700433  | 2.184614  | 1.026770  |
| C | 2.115381  | 0.737056  | 0.956592  |
| H | 1.483702  | 1.284746  | 1.649124  |
| C | 1.669200  | -0.476491 | 0.431709  |
| C | 0.291641  | -0.999015 | 0.749678  |
| H | -0.077921 | -0.569968 | 1.685273  |
| H | 0.298626  | -2.086273 | 0.854947  |
| C | -0.698047 | -0.645493 | -0.375235 |
| H | -0.384871 | -1.132777 | -1.304952 |
| C | -2.080209 | -1.194442 | -0.025283 |
| C | -2.034661 | 1.380866  | -0.307014 |
| H | 5.154944  | 0.931338  | -0.539351 |

## References

1. X. F. Tao, B. T. Zheng, H. R. Kricheldorf and J. Ling, *J. Polym. Sci., Part A: Polym. Chem.*, 2017, **55**, 404-410.
2. Marcus, R. A.; Rice, O. K. *J. Phys. Chem.* **1951**, 55, 894–908.
